# Supplementary material
Source: Springer Nature journal article supplement (https://www.springermedizin.de/resource/supplementary/12950_2012_263_MOESM5_ESM.pdf/9558298)

**A**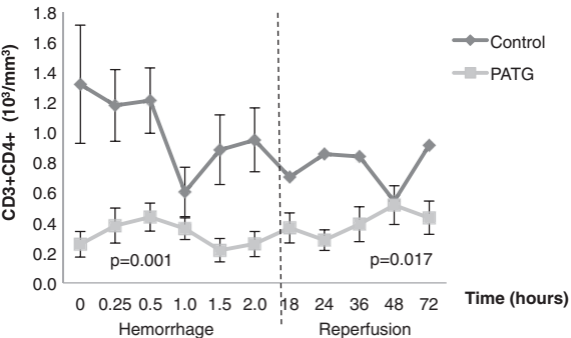**B**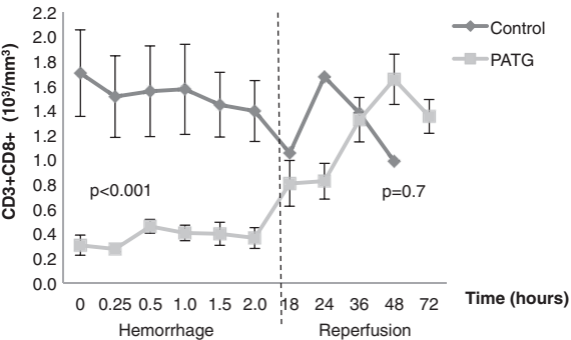

Supplement: MOESM5 [file 9558298]
